# Supplementary material for: Reflux symptoms and oesophageal acidification in treated achalasia patients are often not reflux related
Source: PubMed Central journal article supplement (PMC7788183; doi:10.1136/gutjnl-2020-320772), 2020-05-21
Supplement: gutjnl-2020-320772supp001.pdf [file gutjnl-2020-320772supp001.pdf]

*Reflux symptoms in treated achalasia*

*Ponds et al*

### **Supplement 1**

This appendix has been provided by the authors to give readers additional information about the study.

### **Reflux symptoms and oesophageal acidification in treated achalasia patients are often not reflux related**

Fraukje A. Ponds, Jac M. Oors, André J.P.M. Smout, Albert J. Brederoord

*Department of Gastroenterology and Hepatology, Amsterdam UMC, University of Amsterdam, Meibergdreef 9, Amsterdam, The Netherlands.*

*Reflux symptoms in treated achalasia**Ponds et al***Appendix**

## 1. Study subject and inclusion criteria

## 1.1 Eligibility criteria

**Tables**

1. Factors related to acid hypersensitivity.
2. Factors related to pathological acid exposure.
3. Outcome 24-hour pH-impedance, oesophagogastroduodenoscopy and provocation tests per treatment group.

**1. Study subject and inclusion criteria***1.1 Eligibility criteria***Inclusion criteria**

Treated achalasia patients with gastro-oesophageal reflux symptoms

- Diagnosis of idiopathic achalasia confirmed by oesophageal manometry that shows the following criteria:
  - Aperistalsis or simultaneous contractions in the oesophageal body.
  - LOS dysrelaxation.
- Treatment of achalasia with one of the following procedures:
  - Endoscopic balloon dilatation
  - Surgical Heller myotomy
  - Per-oral endoscopic myotomy (POEM)
- Minimum total score on the Gastro-Oesophageal Reflux Disease Questionnaire (GORDQ) of  $\geq 8$ .
- Gastro-oesophageal symptoms after treatment lasting more than 3 months.
- Age 18-80 years.
- Written informed consent.

Treated achalasia patients without gastro-oesophageal reflux symptoms

- Diagnosis of idiopathic achalasia confirmed by oesophageal manometry that shows the following criteria:
  - Aperistalsis or simultaneous contractions in the oesophageal body.
  - LOS dysrelaxation.
- Treatment of achalasia with one of the following procedures:
  - Endoscopic balloon dilatation
  - Surgical Heller myotomy
  - Per-oral endoscopic myotomy (POEM)
- Maximum total score on the Gastro-Oesophageal Reflux Disease Questionnaire (GORDQ) of  $< 8$ .
- No gastro-oesophageal symptoms after treatment.
- Age 18-80 years.

*Reflux symptoms in treated achalasia**Ponds et al*

- Written informed consent.

**Exclusion criteria**Treated achalasia patients with gastro-oesophageal reflux symptoms

- Pseudoachalasia.
- Upper gastrointestinal malignancy.
- Chagas disease.
- Peptic ulcer disease.
- Inability to stop PPI, H2-receptor antagonist or prokinetic drug for two weeks
- Presence of an extremely dilated oesophagus body >5 cm

Treated achalasia patients without gastro-oesophageal reflux symptoms

- Pseudoachalasia.
- Upper gastrointestinal malignancy.
- Chagas disease.
- Peptic ulcer disease.
- Inability to stop PPI, H2-receptor antagonist or prokinetic drug for two weeks
- Presence of an extremely dilated oesophagus body >5 cm

## Reflux symptoms in treated achalasia

Ponds et al

## Tables

|                                                                          | Patients with acid hypersensitivity<br>(n=25) | Patients without acid hypersensitivity<br>(n=13) | <i>P</i> |
|--------------------------------------------------------------------------|-----------------------------------------------|--------------------------------------------------|----------|
| <b>Achalasia subtype at diagnosis</b> (n (%))                            |                                               |                                                  | 0.64     |
| Type I                                                                   | 9 (36)                                        | 4 (31)                                           |          |
| Type II                                                                  | 15 (60)                                       | 8 (62)                                           |          |
| Type III                                                                 | 1 (4)                                         | 1 (8)                                            |          |
| <b>Achalasia treatment</b> (n (%))                                       |                                               |                                                  | 0.90     |
| Pneumodilation <sup>#</sup>                                              | 1 (4)                                         | 1 (8)                                            |          |
| Laparoscopic Heller's myotomy                                            | 7 (28)                                        | 2 (15)                                           |          |
| Peroral endoscopic myotomy                                               | 7 (28)                                        | 4 (31)                                           |          |
| Pneumodilation* and laparoscopic Heller's myotomy                        | 7 (28)                                        | 4 (31)                                           |          |
| Pneumodilation* and peroral endoscopic myotomy                           | 3 (12)                                        | 2 (15)                                           |          |
| <b>Disease duration</b> (years (mean (SD)))                              | 8.2 (7.0)                                     | 7.8 (5.7)                                        | 0.85     |
| <b>24-hour pH-impedance monitoring</b>                                   |                                               |                                                  |          |
| <b>Acid exposure time</b> (AET: % of time pH <4; mean (95% CI))          |                                               |                                                  |          |
| Total                                                                    | 13.9 (7.3 to 20.5)                            | 9.2 (3.4 to 14.9)                                | 0.33     |
| Upright                                                                  | 10.8 (5.3 to 16.2)                            | 4.8 (2.2 to 7.4)                                 | 0.05     |
| Supine                                                                   | 18.0 (7.7 to 28.4)                            | 15.2 (4.1 to 26.3)                               | 0.73     |
| <b>Pathological acid exposure</b> (AET pH<4 in >6%; n (%))               | 17 (68)                                       | 7 (54)                                           | 0.39     |
| <b>Baseline impedance</b> ( $\Omega$ ; median (IQR))                     |                                               |                                                  |          |
| Proximal                                                                 | 2411 (1649-3150)                              | 2220 (1780-2773)                                 | 0.55     |
| Distal                                                                   | 487 (368-660)                                 | 476 (339-750)                                    | 1.00     |
| <b>Endoscopy</b>                                                         |                                               |                                                  |          |
| Reflux oesophagitis (n (%))                                              | 11 (44)                                       | 3 (23)                                           | 0.29     |
| <b>High resolution manometry</b>                                         |                                               |                                                  |          |
| Basal LOS pressure (mmHg, median (IQR))                                  | 3 (2-6)                                       | 3 (3-7)                                          | 0.70     |
| Integrated relaxation pressure (mmHg, median (IQR))                      | 6.6 (3.3-8.6)                                 | 5.9 (3.7-9.3)                                    | 0.87     |
| <b>OGJ distensibility</b> (at 50 mL, mmHg/m <sup>2</sup> , median (IQR)) | 5.2 (4.5-7.0)                                 | 4.8 (2.7-5.8)                                    | 0.11     |

*Reflux symptoms in treated achalasia**Ponds et al*

| <b>Timed barium oesophagogram</b>                   |               |             |      |
|-----------------------------------------------------|---------------|-------------|------|
| Barium column at 5 min (cm, median (IQR))           | 1.4 (0-2.5)   | 1.7 (0-2.6) | 0.81 |
| Oesophageal diameter (cm, median (IQR))             | 2.5 (2-3.1)   | 2.3 (2-2.8) | 0.93 |
| <b>Perception oesophageal mechanical distension</b> |               |             |      |
| Volume first perception (mL, median (IQR))          | 50 (40-70)    | 70 (65-70)  | 0.01 |
| Symptom intensity (VAS, median (IQR))               | 2.9 (0.3-5.9) | 0 (0-1.9)   | 0.05 |
| Distension sensitivity score (median (IQR))         | 47 (0-160)    | 0 (0-7)     | 0.02 |

**Table 1.** Factors related to acid hypersensitivity.

Abbreviations: AET, acid exposure time; CI, confidence interval; LOS, lower oesophageal sphincter; OGJ, oesophagogastric junction; IQR, interquartile range; VAS, visual analogue score.

#Pneumodilation up till 35-mm balloon. \*Pneumodilation up till 40-mm balloon.

## Reflux symptoms in treated achalasia

Ponds *et al*

|                                                                          | Patients with pathological acid exposure<br>(n=24) | Patients without pathological acid exposure<br>(n=14) | <i>P</i> |
|--------------------------------------------------------------------------|----------------------------------------------------|-------------------------------------------------------|----------|
| <b>BMI</b> (kg/m <sup>2</sup> ; mean (SD))                               | 26.2 (4.3)                                         | 24.8 (2.7)                                            | 0.27     |
| <b>High resolution manometry</b>                                         |                                                    |                                                       |          |
| Basal LOS pressure (mmHg, median (IQR))                                  | 3 (2-4.8)                                          | 4.6 (3-9.3)                                           | 0.034    |
| Integrated relaxation pressure (mmHg, median (IQR))                      | 6.2 (3.1-8.7)                                      | 6.4 (4-10.5)                                          | 0.56     |
| <b>OGJ distensibility</b> (at 50 mL, mmHg/m <sup>2</sup> , median (IQR)) | 5.5 (4.6-7.0)                                      | 4.6 (3.4-5.5)                                         | 0.032    |
| <b>Timed barium oesophagogram</b>                                        |                                                    |                                                       |          |
| Barium column at 5 min (cm, median (IQR))                                | 0 (0-1.8)                                          | 2.5 (1.2-3.1)                                         | 0.002    |
| Oesophageal diameter (cm, median (IQR))                                  | 2.2 (2-3)                                          | 2.7 (2-3.4)                                           | 0.18     |
| <b>24-hour pH-impedance monitoring</b>                                   |                                                    |                                                       |          |
| <b>Baseline impedance</b> ( $\Omega$ , median (IQR))                     |                                                    |                                                       |          |
| Proximal                                                                 | 2163 (1865-2739)                                   | 2763 (1585-3260)                                      | 0.23     |
| Distal                                                                   | 487 (347-730)                                      | 493 (348-702)                                         | 0.88     |
| <b>Acid perfusion test</b>                                               |                                                    |                                                       |          |
| Time to perception (min, median (IQR))                                   | 8 (4-27.5)                                         | 9 (5.5-30)                                            | 0.46     |
| Symptom intensity (VAS, median (IQR))                                    | 5.5 (0.6-8)                                        | 4.1 (0-7)                                             | 0.48     |
| Perfusion hypersensitivity score (median (IQR))                          | 82 (1-135)                                         | 64 (0-170)                                            | 0.82     |
| <b>Perception oesophageal mechanical distension</b>                      |                                                    |                                                       |          |
| Volume first perception (mL, median (IQR))                               | 70 (50-70)                                         | 60 (40-70)                                            | 0.60     |
| Symptom intensity (VAS, median (IQR))                                    | 1.5 (0-4.3)                                        | 1 (0-5.2)                                             | 0.82     |
| Oesophageal distension sensitivity score (median (IQR))                  | 0 (0-84)                                           | 9 (0-174)                                             | 0.61     |

**Table 2.** Factors related to pathological acid exposure.

Abbreviations: BMI, body mass index; CI, confidence interval; LOS, lower oesophageal sphincter; IQR, interquartile range; OGJ, Oesophagogastric junction; VAS, visual analogue score.

## Reflux symptoms in treated achalasia

Ponds et al

|                                                                 | Laparoscopic<br>Heller's myotomy<br>(n=20) | Peroral endoscopic<br>myotomy<br>(n=16) | <i>P</i> |
|-----------------------------------------------------------------|--------------------------------------------|-----------------------------------------|----------|
| <b>24-hour pH-impedance monitoring</b>                          |                                            |                                         |          |
| <b>Acid exposure time</b> (AET: % of time pH <4; mean (95% CI)) |                                            |                                         |          |
| Total                                                           | 8.1 (3.6 to 12.5)                          | 19.1 (10.2 to 28.1)                     | 0.02     |
| Upright                                                         | 6.5 (2.3 to 10.7)                          | 12.5 (5.4 to 19.6)                      | 0.12     |
| Supine                                                          | 9.6 (3.4 to 15.9)                          | 28.5 (13.3 to 43.7)                     | 0.02     |
| <b>Pathological acid exposure</b> (AET pH<4 in >6%; n (%))      | 11 (55)                                    | 13 (81)                                 | 0.16     |
| <b>Acidification patterns</b> (% of time; mean (95% CI))        |                                            |                                         |          |
| Acid reflux with normal clearance                               | 0.08 (0.01 to 0.14)                        | 0.2 (0.06 to 0.33)                      | 0.10     |
| Acid reflux with delayed clearance                              | 2.8 (0.07 to 5.57)                         | 7.6 (1.1 to 14.1)                       | 0.16     |
| Acid fermentation                                               | 3.5 (0.8 to 6.12)                          | 5.6 (1.4 to 9.8)                        | 0.34     |
| Stasis of ingested acidic food                                  | 3.8 (-1.04 to 8.58)                        | 6.7 (-0.9 to 14.6)                      | 0.46     |
| Unclassified                                                    | 0.3 (-0.1 to 0.73)                         | 1.8 (-0.98 to 4.6)                      | 0.28     |
| <b>Number of acidification events</b> (median (IQR))            |                                            |                                         |          |
| Acid reflux with normal clearance                               | 0 (0-1)                                    | 0.5 (0-2.8)                             | 0.15     |
| Acid reflux with delayed clearance                              | 0 (0-1)                                    | 1.5 (0-3)                               | 0.07     |
| Acid fermentation                                               | 0 (0-1.8)                                  | 0.5 (0-2.5)                             | 0.57     |
| Stasis of ingested acidic food                                  | 0 (0-1)                                    | 0 (0-2)                                 | 0.23     |
| Unclassified                                                    | 0 (0-1)                                    | 0 (0-0.8)                               | 0.79     |
| <b>Number of patients per acidification pattern</b> (n (%))     |                                            |                                         |          |
| Acid reflux with normal clearance                               | 6 (30)                                     | 8 (50)                                  | 0.22     |
| Acid reflux with delayed clearance                              | 8 (40)                                     | 10 (63)                                 | 0.18     |
| Acid fermentation                                               | 8 (40)                                     | 9 (56)                                  | 0.33     |
| Stasis of ingested acidic food                                  | 6 (30)                                     | 7 (44)                                  | 0.39     |
| Unclassified                                                    | 6 (30)                                     | 4 (25)                                  | 0.74     |
| <b>Endoscopy</b>                                                |                                            |                                         |          |
| Reflux oesophagitis (n (%))                                     | 7 (35)                                     | 7 (44)                                  | 0.59     |
| <b>Acid perfusion test</b>                                      |                                            |                                         |          |
| Time to perception (min, median (IQR))                          | 6 (4-20)                                   | 14 (4-30)                               | 0.26     |
| Symptom intensity (VAS, median (IQR))                           | 5.4 (1.1-7.8)                              | 3.8 (0-7.9)                             | 0.65     |
| Perfusion sensitivity score (median (IQR))                      | 112 (8-172)                                | 35 (0-110)                              | 0.12     |



*Reflux symptoms in treated achalasia**Ponds et al*

---

| <b>Perception oesophageal mechanical distension</b> |            |             |      |
|-----------------------------------------------------|------------|-------------|------|
| Volume first percepton (mL, median (IQR))           | 60 (40-70) | 70 (50-70)  | 0.36 |
| Symptom intensity (VAS, median (IQR))               | 3 (0-5.2)  | 1.2 (0-2.6) | 0.26 |
| Distension sensitivity score (median (IQR))         | 13 (0-170) | 0 (0-71)    | 0.26 |

---

Table 3. Outcome 24-hour pH-impedance, oesophagogastroduodenoscopy and provocation tests per treatment group.

Abbreviations: AET, acid exposure time, CI, confidence interval; IQR, interquartile range; VAS, visual analogue score.
